# Supplementary material for: Frankixalus, a New Rhacophorid Genus of Tree Hole Breeding Frogs with Oophagous Tadpoles
Source: PubMed Central journal article supplement (PMC4720377; doi:10.1371/journal.pone.0145727), 2016-01-20
Supplement: pone.0145727.s001.pdf [file pone.0145727.s001.pdf]

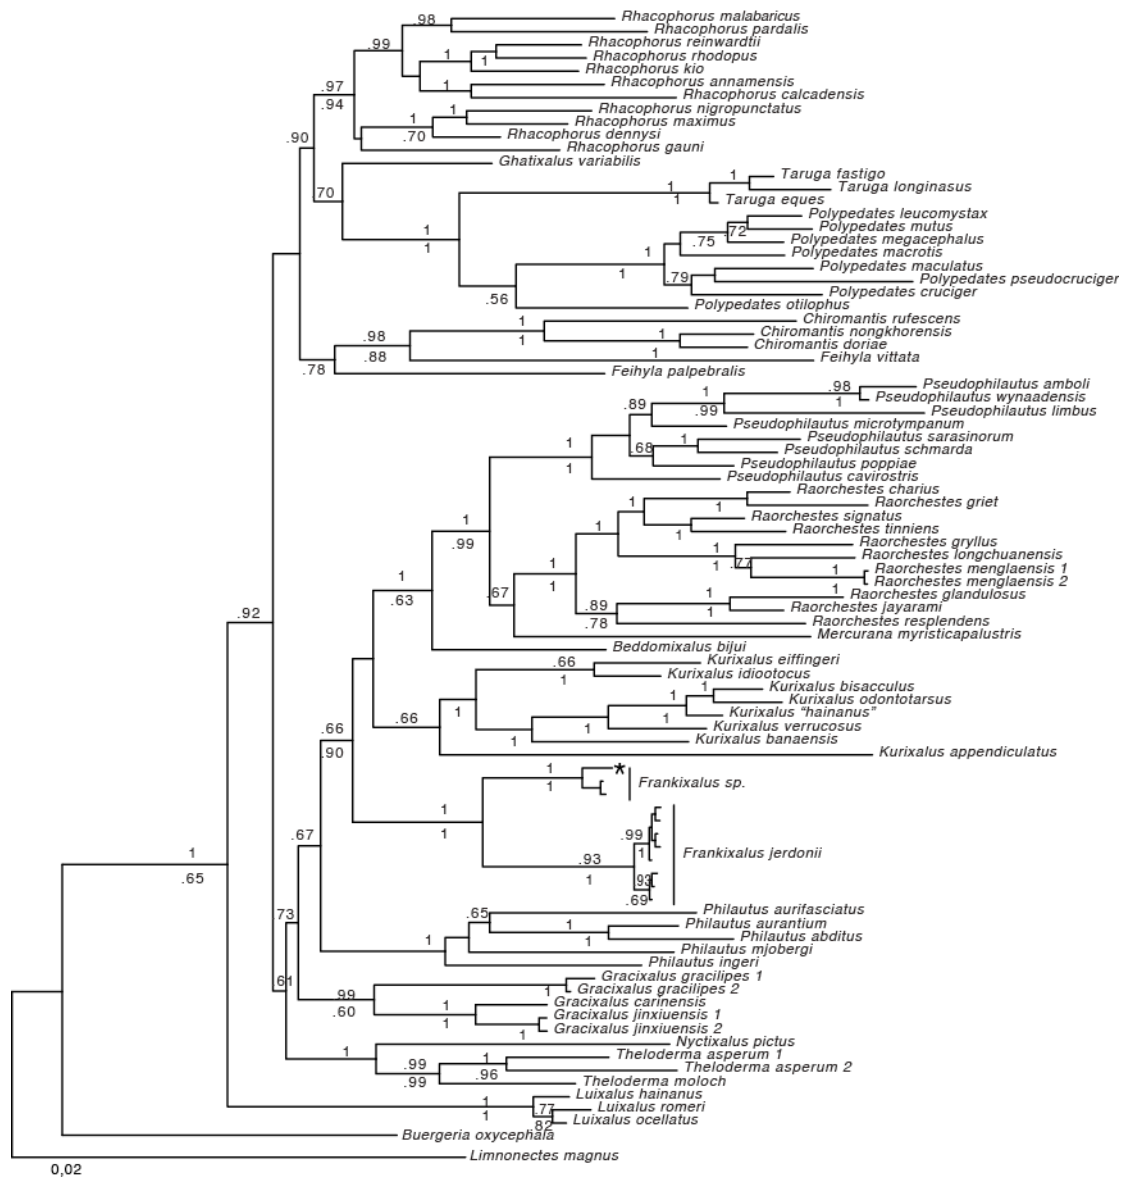

**S1 Fig. Bayesian consensus phylogram of the total dataset showing phylogenetic relationships among 86 taxa representing all known rhacophorid genera and one outgroup species. Numbers above and below the branches represent Bayesian Posterior Probabilities obtained for the nuclear and mitochondrial datasets, respectively.**
