# Supplementary material for: Frankixalus, a New Rhacophorid Genus of Tree Hole Breeding Frogs with Oophagous Tadpoles
Source: PubMed Central journal article supplement (PMC4720377; doi:10.1371/journal.pone.0145727), 2016-01-20
Supplement: pone.0145727.s003.pdf [file pone.0145727.s003.pdf]

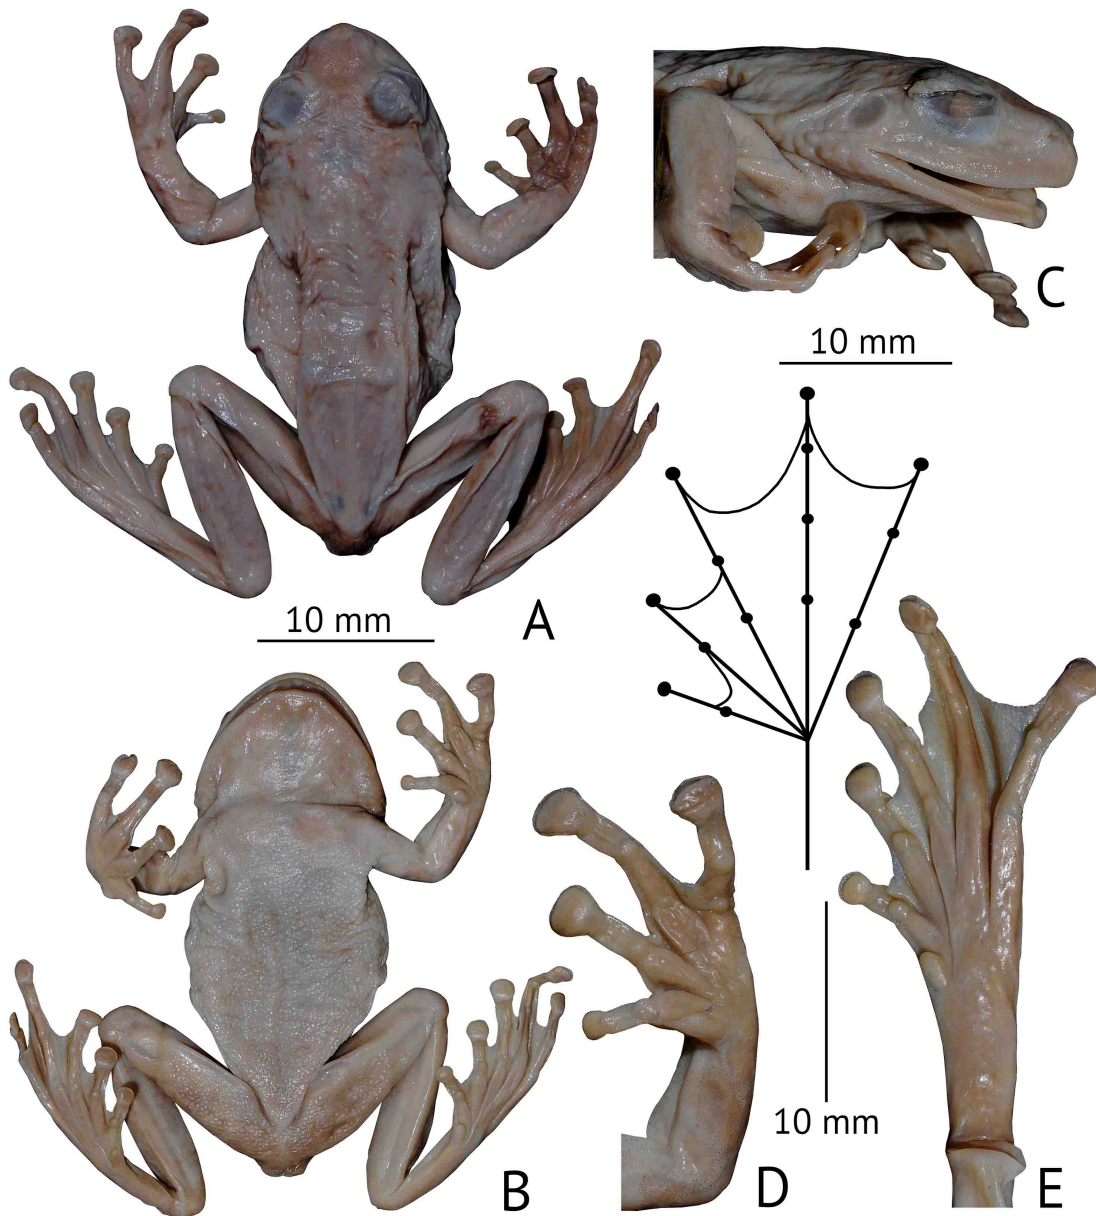

**S3 Fig. Lectotype of *Polypedates jerdonii* (= *Frankixalus jerdonii*), NHM 1947.2.7.84 (ex BMNH 1872.4.17.189).** (A) dorsal view, (B) ventral view, (C) lateral view of head, (D) ventral view of hand, (E) ventral view of foot, (F) schematic illustration of webbing on foot.
